# Supplementary material for: PLAGL2 promotes the proliferation and migration of gastric cancer cells via USP37-mediated deubiquitination of Snail1
Source: PubMed Central journal article supplement (PMC7738862; doi:10.7150/thno.47800), 2021-01-01
Supplement: thnov11p0700s1.pdf [file thnov11p0700s1.pdf]

1 **Table S1.** Primary antibodies for WB  
 2

| Antibody      | Concentration | Specificity       | Company                   |
|---------------|---------------|-------------------|---------------------------|
| PLAGL2        | 1:1000        | Rabbit polyclonal | Abcam                     |
| E-cadherin    | 1:1000        | Mouse monoclonal  | Proteintech               |
| Vimentin      | 1:1000        | Mouse monoclonal  | Proteintech               |
| N-cadherin    | 1:1000        | Rabbit monoclonal | Proteintech               |
| P27kip1       | 1:1000        | Mouse monoclonal  | Cell Signaling Technology |
| Cyclin-E      | 1:1000        | Rabbit monoclonal | Cell Signaling Technology |
| His           | 1:2000        | Mouse monoclonal  | Proteintech               |
| GAPDH         | 1:2000        | Rabbit monoclonal | Proteintech               |
| Flag          | 1:2000        | Mouse monoclonal  | Proteintech               |
| HA            | 1:2000        | Mouse monoclonal  | Proteintech               |
| CDK4          | 1:1000        | Rabbit monoclonal | Proteintech               |
| Cyclin-D1     | 1:1000        | Mouse monoclonal  | Proteintech               |
| Snail1        | 1:1000        | Rabbit polyclonal | Proteintech               |
| USP37         | 1:1000        | Rabbit polyclonal | Proteintech               |
| MYC           | 1:1000        | Mouse monoclonal  | Proteintech               |
| GSK-3 $\beta$ | 1:1000        | Rabbit monoclonal | Cell Signaling Technology |
| Ub            | 1:1000        | Rabbit Polyclonal | Proteintech               |
| USP38         | 1:1000        | Rabbit Polyclonal | Proteintech               |
| DUSP18        | 1:1000        | Mouse Polyclonal  | Abcom                     |
| MMP9          | 1:1000        | Rabbit Polyclonal | Proteintech               |

3  
 4  
 5  
 6  
 7  
 8  
 9  
 10  
 11  
 12  
 13  
 14  
 15  
 16  
 17  
 18  
 19  
 20  
 21  
 22  
 23

24 **Table S2.** Sequence of primers for Quantitative reverse transcription-PCR

25

| Gene       | Forward primer (5'-----3') | Reverse primer (5'-----3') |
|------------|----------------------------|----------------------------|
| PLAGL2     | GAGTCAAGTGAAGTGCCAATGT     | TGAGGGCAGCTATATGGTCTC      |
| E-cadherin | CGAGAGCTACACGTTACGG        | GGGTGTCGAGGGAAAAATAGG      |
| Vimentin   | CGAAACTTCTCAGCATCACG       | GCAGAAAGGCACTTGAAAGC       |
| N-cadherin | TCAGGCGTCTGTAGAGGCTT       | ATGCACATCCTTCGATAAGACTG    |
| P27kip1    | AACGTGCGAGTGTCTAACGG       | CCCTCTAGGGGTTTGTGATTCT     |
| Cyclin-D1  | GCTGCGAAGTGGAACCATC        | CCTCCTTCTGCACACATTTGAA     |
| Cyclin-E   | AAGGAGCGGGACACCATGA        | ACGGTCACGTTTGCCTTCC        |
| CDK4       | TCAGCACAGTTCGTGAGGTG       | GTCCATCAGCCGGACAACAT       |
| Cyclin-D1  | GTGCTGCGAAGTGGAACC         | ATCCAGGTGGCGACGATCT        |
| MMP9       | AGACCTGGGCAGATTCCAAAC      | CGGCAAGTCTTCCGAGTAGT       |
| GAPDH      | AGAAGGCTGGGGCTCATTG        | AGGGGCCATCCACAGTCTTC       |

26

27

28

29

30

31

32

33

34

35

36

37

38

39

40

41 **Supplementary Figure Legends**

42 **Figure S1. PLAGL2 promotes the proliferation, migration, and invasion of GC cells in vitro**  
43 **and in vivo.** (A) The qRT-PCR analysis of PLAGL2 expression in SGC7901 transfected with Lenti-  
44 shPLAGL2 and AGS transfected with Lenti-PLAGL2. (B) The cell cycle results of PLAGL2  
45 knockdown SGC7901 cell and PLAGL2 overexpression AGS cell. (C) The qRT-PCR analysis of the  
46 expression level of crucial cell cycle regulatory proteins and EMT-related proteins in PLAGL2  
47 knockdown SGC7901 cell and PLAGL2 overexpression AGS cell. (D) Representative IHC images  
48 of the expression of essential cell cycle regulatory proteins and EMT-related proteins in the  
49 corresponding xenograft. Scale bars, 50 $\mu$ m. (E) The IHC scores of the expression of essential cell  
50 cycle regulatory proteins and EMT-related proteins in the corresponding xenograft.

51

52 **Figure S2. PLAGL2 stabilizes Snail1 protein by inhibiting its ubiquitination.** (A) The qRT-PCR  
53 analysis of the Snail1 expression level in PLAGL2 knockdown SGC7901 cell and PLAGL2  
54 overexpression AGS cell. (B) WB analysis of protein levels of PLAGL2 and Snail1 in clinical GC  
55 specimens. (C) Ubiquitination assays of endogenous Snail1 in the lysates from PLAGL2  
56 overexpression AGS cell. (D) WB analysis of Snail1 expression in SGC7901 transfected with two  
57 independent Snail1 siRNAs and AGS transfected with Snail1 plasmid. (E) Transwell assays detected  
58 the effect of Snail1 on PLAGL2-induced migration. Scale bars, 200 $\mu$ m. (F-G) The qRT-PCR  
59 analysis of the expression level of EMT-related genes and critical cell cycle regulatory genes in  
60 cotransfected SGC7901 and AGS cells.

61

62 **Figure S3. USP37 interacts with and deubiquitinates Snail1 directly.** (A) WB analysis of protein

63 levels of Snail1 and USP37 in HEK-293T cell transfected with two independent USP37 siRNAs  
64 and USP37 plasmid. **(B)** The qRT-PCR analysis of mRNA levels of Snail1 in HEK-293T cell  
65 transfected with USP37 siRNAs and USP37 plasmid, in SGC7901 cell transfected with two  
66 independent USP37 siRNAs and in AGS cell expressing USP37 plasmid. **(C-D)** The stability of  
67 Snail1 by USP37 was estimated using the pulse-chase assay.

68

69 **Figure S4. PLAGL2 modulates Snail1 stability by activating USP37 transcription.** **(A)** The  
70 qRT-PCR analysis of Snail1 mRNA level in SGC7901 cell cotransfected with Lenti-shPLAGL2 and  
71 USP37 plasmid and AGS cell cotransfected with Lenti-PLAGL2 and USP37 siRNA. **(B-D)**  
72 Transwell assays detected the effect of USP37 on PLAGL2-induced migration. Scale bars, 200 $\mu$ m.  
73 The average number of cells per field was calculated. **(E)** WB analysis of crucial cell cycle  
74 regulatory proteins' expression level in cotransfected SGC7901 and AGS cells. **(F)** The qRT-PCR  
75 analysis of the expression level of key cell cycle regulatory genes in cotransfected SGC7901 and  
76 AGS cells.

77

78

79

80

81

82

83

84

85 **Figure S1**

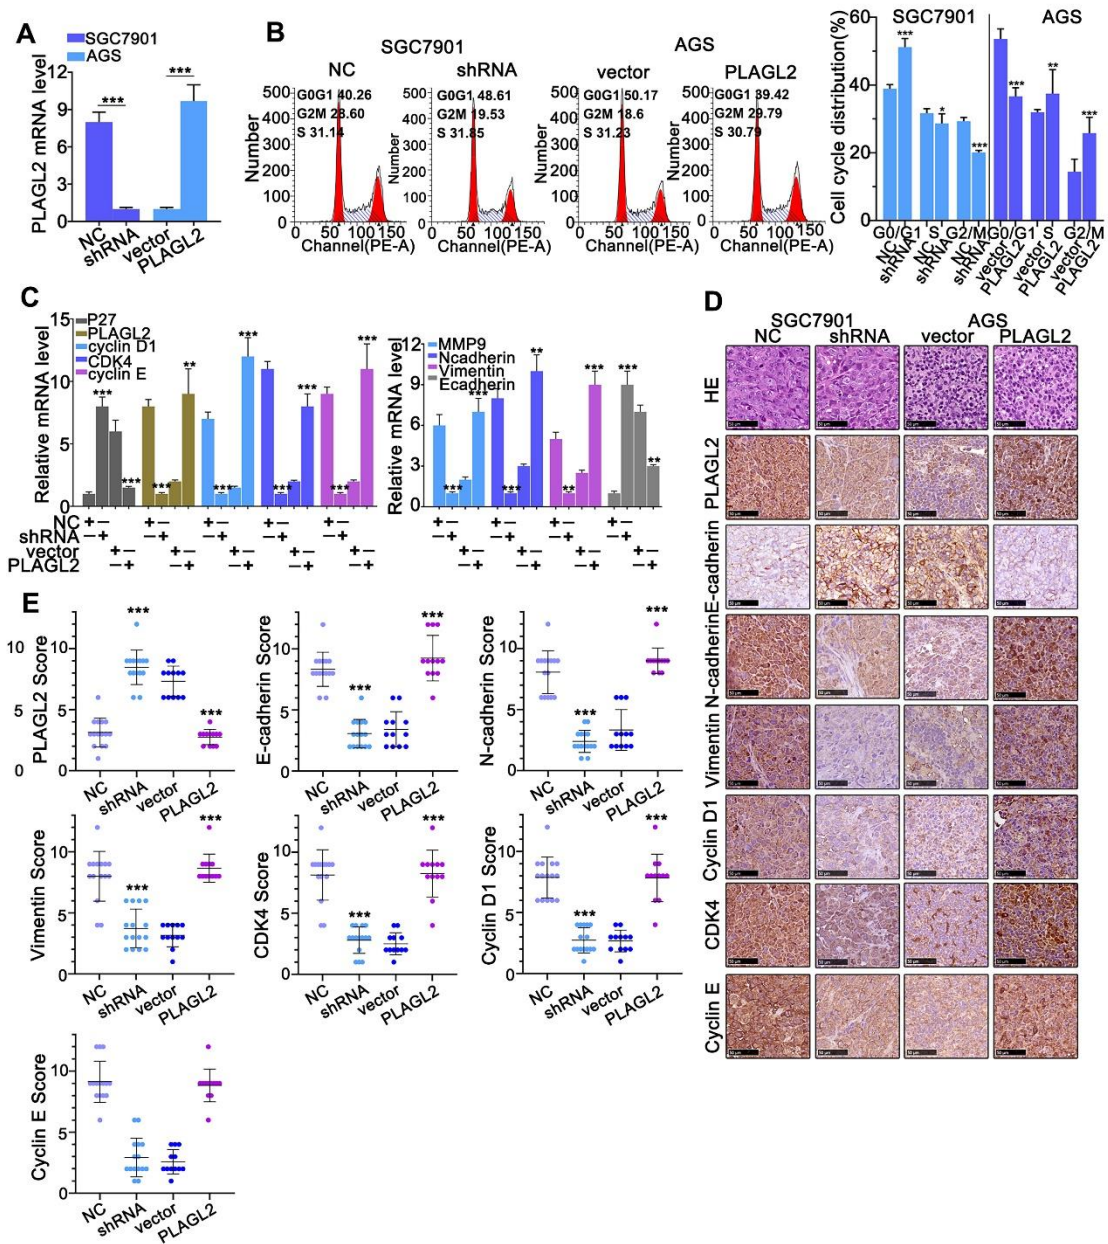

86

87

88

89

90

91

92

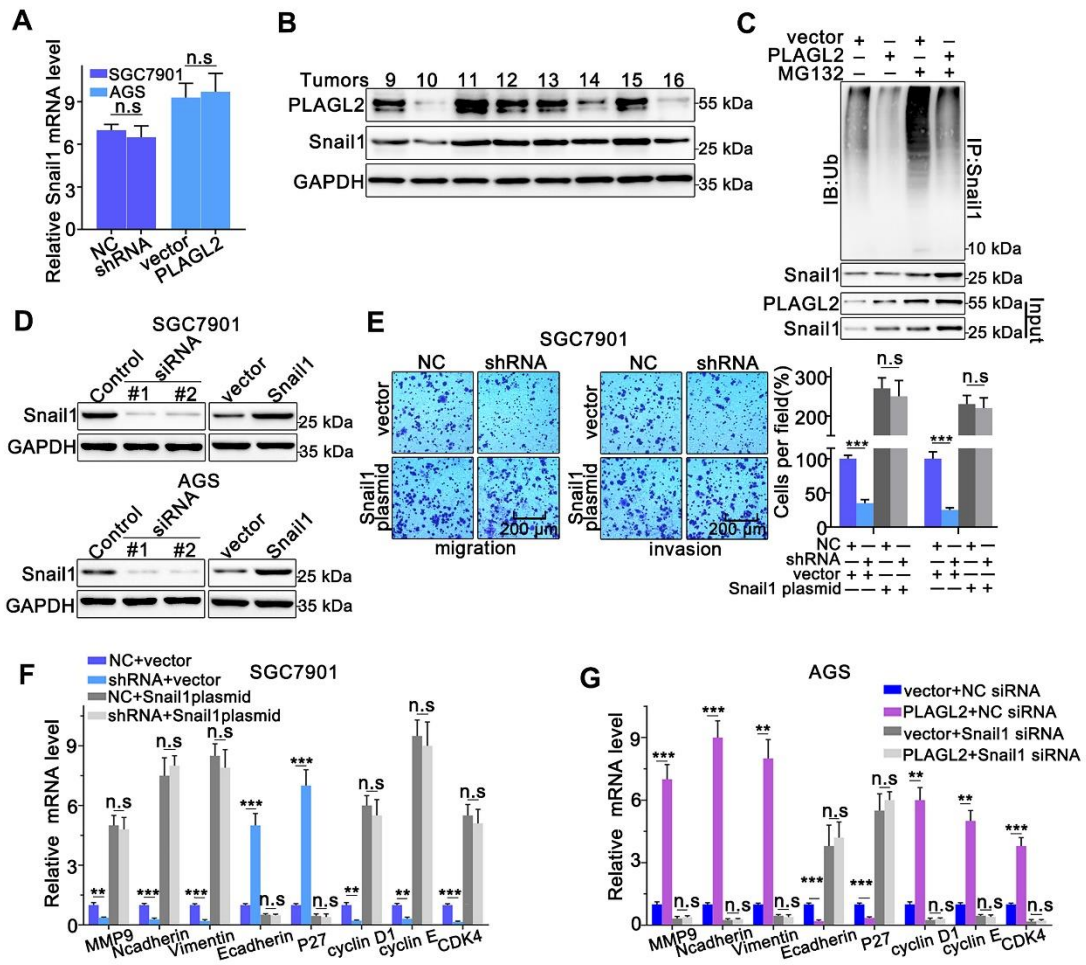

94

95

96

97

98

99

100

101

102

103

104 **Figure S3**

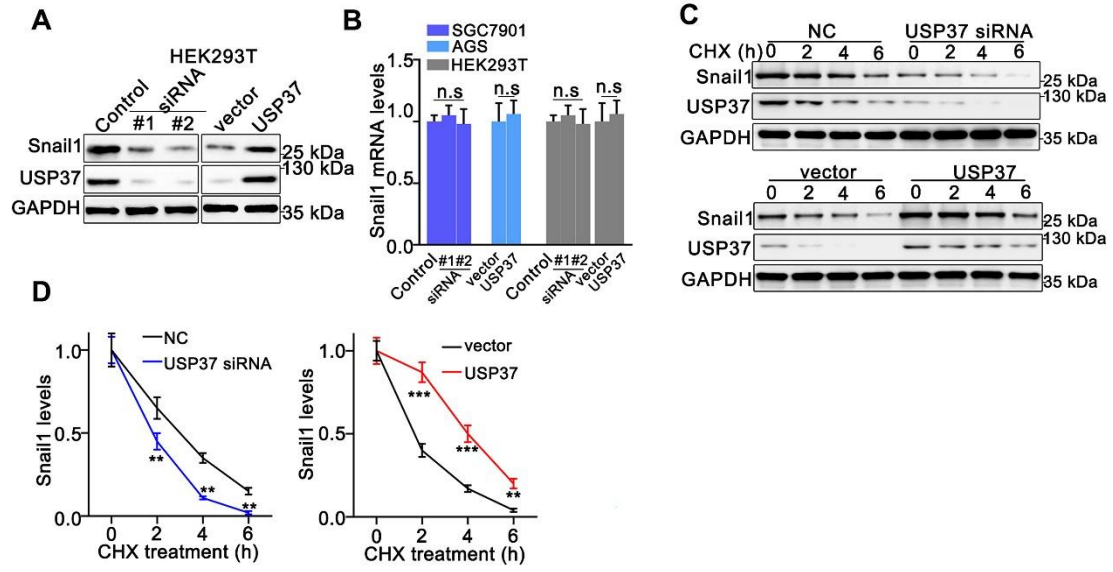

105

106

107

108

109

110

111

112

113

114

115

116

117

118

119

120 **Figure S4**

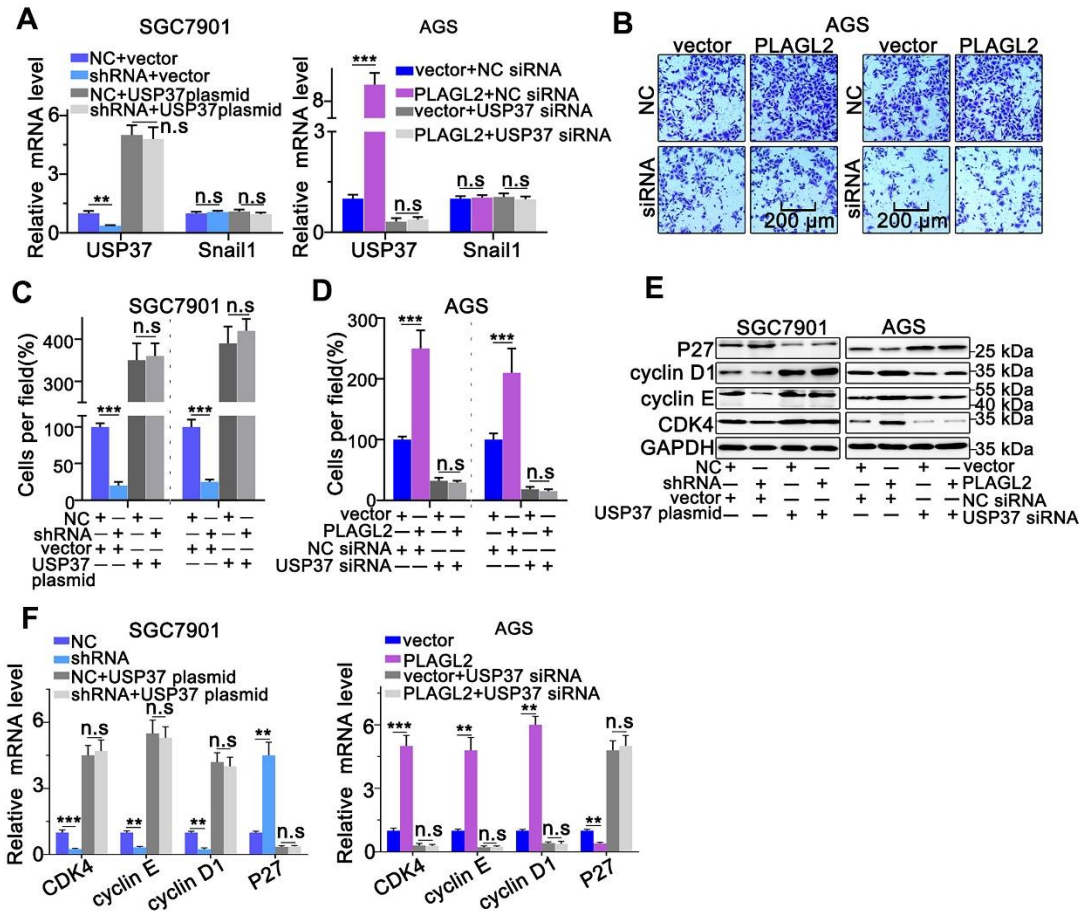

121

122

123

124

125

126

127

128

129

130
